# Supplementary material for: Restoring functional neurofibromin by protein transduction
Source: PubMed Central journal article supplement (PMC5906691; doi:10.1038/s41598-018-24310-5), 2018-04-18
Supplement: 41598_2018_24310_MOESM1_ESM.pdf [file 41598_2018_24310_MOESM1_ESM.pdf]

## Supplementary Information

### Restoring functional neurofibromin by protein transduction

K. Mellert<sup>1\*,3†</sup>, S. Lechner<sup>2</sup>, M. Lüdeke<sup>3</sup>, M. Lamla<sup>4</sup>, P. Möller<sup>1</sup>, R. Kemkemer<sup>5,6</sup>, K. Scheffzek<sup>2†</sup>, D. Kaufmann<sup>3,6\*†</sup>

1 Institute of Pathology, University of Ulm, Ulm, Germany

2 Division of Biological Chemistry, Biocenter, Innsbruck Medical University, Innsbruck, Austria

3 Institute of Human Genetics, University of Ulm, Ulm, Germany

4 Institute of Organic Chemistry III, Ulm University, Ulm, Germany

5 Department of New Materials and Biosystems, Max Planck Institute for Medical Research, Stuttgart, Germany

6 Reutlingen University, Applied Chemistry, Reutlingen, Germany

† Corresponding author: Kevin.mellert@uni-ulm.de, Klaus.scheffzek@i-med.ac.at,

Dieter.h.kaufmann@uni-ulm.de

\* present affiliation

Supplementary Figure 1

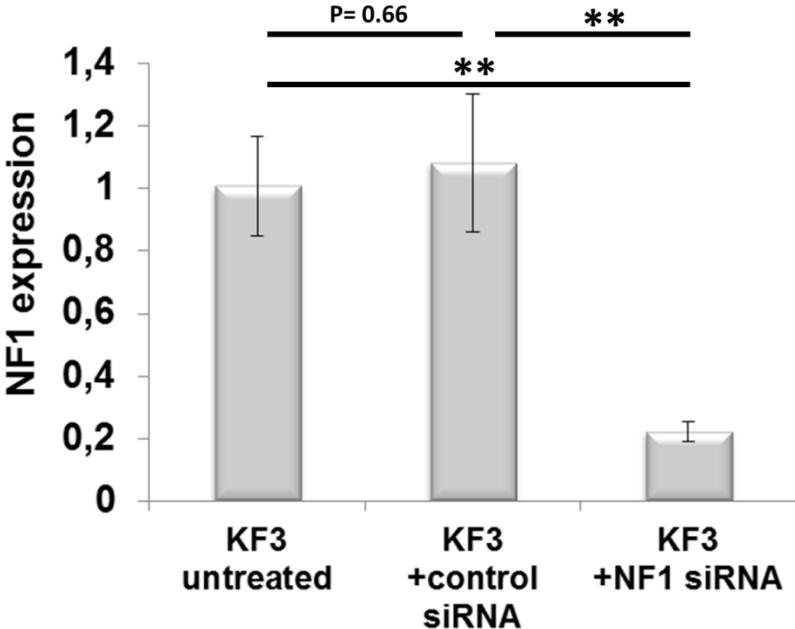

**Supplementary Figure 1: NF1 knockdown by siRNA transfection.** Shown are the levels of measured amounts of NF1 mRNA in KF3 fibroblasts either untreated or after 48 hours of transfection with control siRNA (AllStars Negative Control siRNA, Qiagen, Hilden; KF3 + control siRNA) or 4 NF1 specific siRNAs (KF3 +NF1 siRNA; means of 3 independent experiments). The error bars represent +/- 1 standard deviation. Stars indicate the level of significance (\*\* =  $p < 0,01$ ; two-sided T-test).

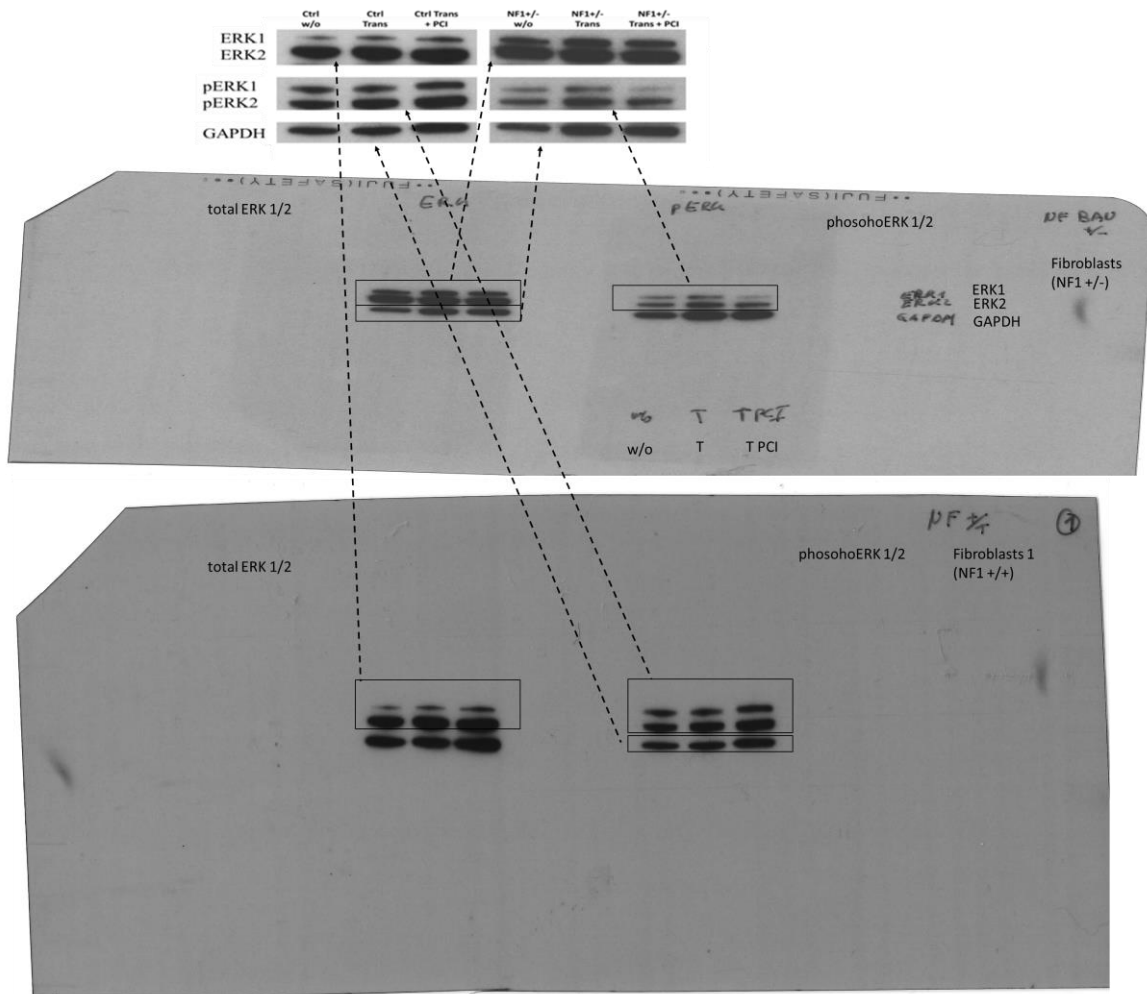

**Supplementary Figure 2: Original western blot detections.** The bands were cut and rearranged from these two photo films as indicated by rectangles and arrows. Annotations were added to enhance the readability of handwritten notes on the original films.

**Supplementary table 1:** Primer and siRNA sequences. Shown are the primer/siRNA names, target genes, sequences, annealing temperatures (AT) and product lengths (P).

| <b>Name</b>    | <b>Gene</b> | <b>Sequence (5'-3') / siRNA ID</b> | <b>AT</b> | <b>P</b> |
|----------------|-------------|------------------------------------|-----------|----------|
| NF1 fwd        | NF1         | GCAGTTCTGACCCGAGTTTACG             | 60°C      | 99 bp    |
| NF1 rev        | NF1         | ATGTCTCTAGTAACTGGCCCTCGAT          | 60°C      |          |
| POLR2A fwd     | POLR2A      | GTTTTGGTGACGACTTGAAGTGG            | 59,5°C    | 145 bp   |
| POLR2A rev     | POLR2A      | CGCAGGAAGACATCATCATC               | 59,5°C    |          |
| ALAS1 fwd      | ALAS1       | TGATGAACTACTTCCTTGAGAATC           | 60°C      | 70 bp    |
| ALAS1 rev      | ALAS1       | GAATGAGGCTTCAGTTCCA                | 60°C      |          |
| <i>siNF1 1</i> | NF1         | SI02664445 (FlexiTube, Qiagen)     | -         | -        |
| <i>siNF1 2</i> | NF1         | SI02664438 (FlexiTube, Qiagen)     | -         | -        |
| <i>siNF1 3</i> | NF1         | SI04949938 (FlexiTube, Qiagen)     | -         | -        |
| <i>siNF1 4</i> | NF1         | SI04949931 (FlexiTube, Qiagen)     | -         | -        |
